# Supplementary material for: Single-Cell-Based Analysis Highlights a Surge in Cell-to-Cell Molecular Variability Preceding Irreversible Commitment in a Differentiation Process
Source: PLOS journal article supplement (doi:10.1371/journal.pbio.1002585), 2016-12-27

A

Self-renewal

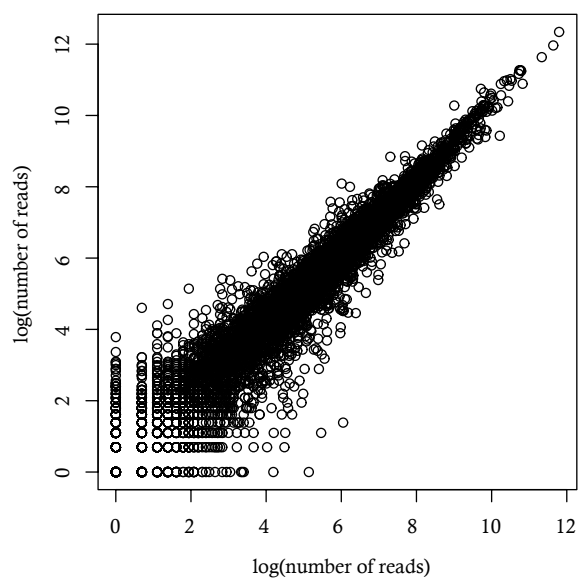

B

48 h of differentiation

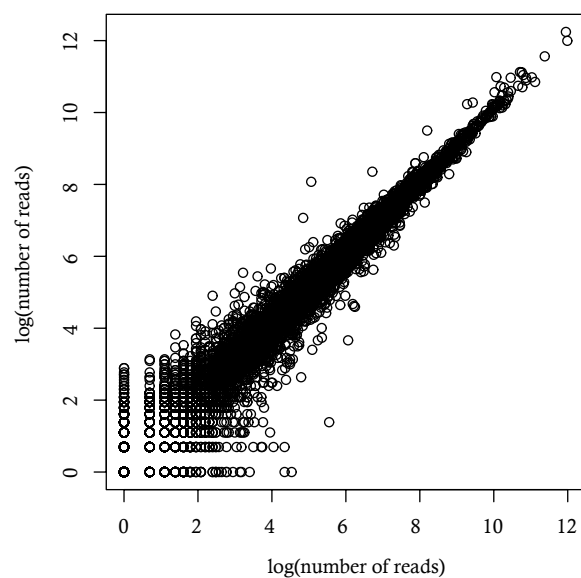

C

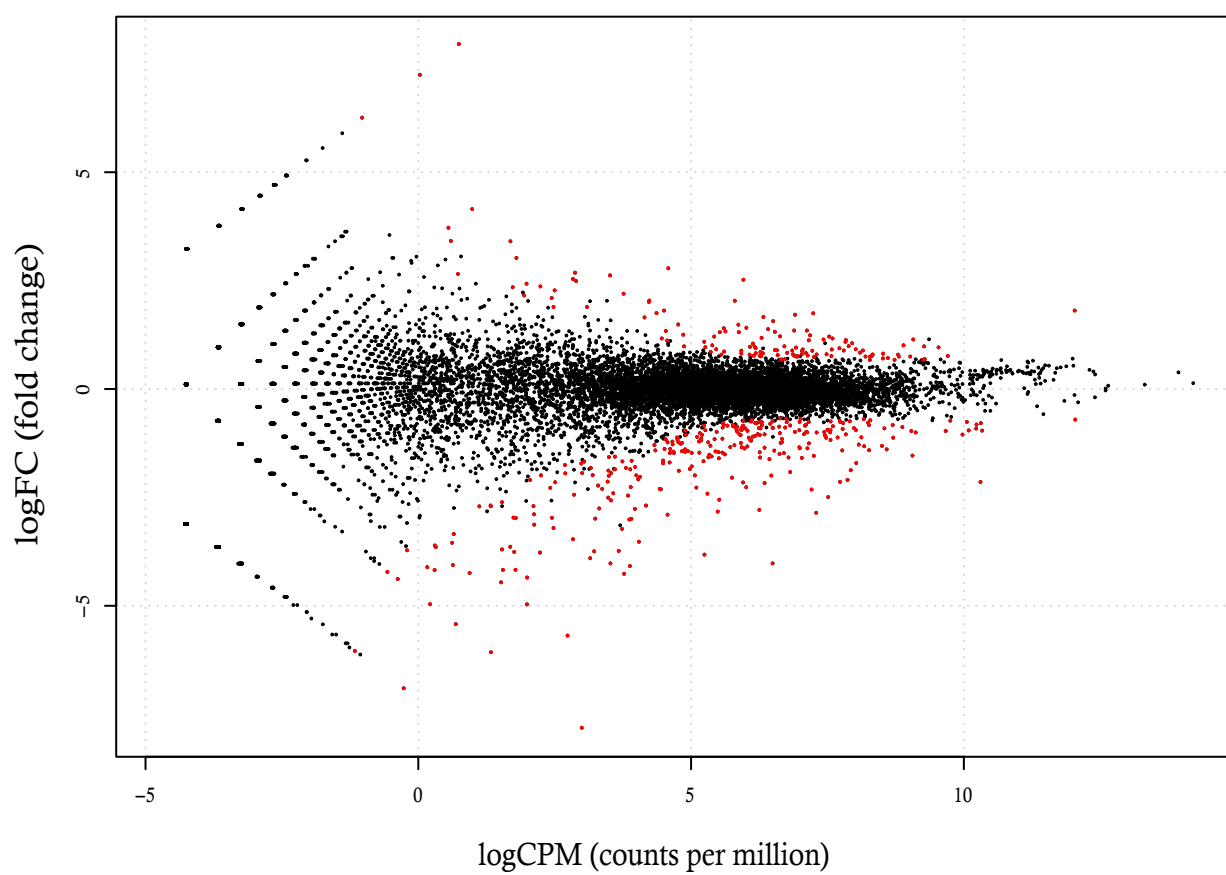

Supplement: S3 (10.1371/journal.pbio.1002585.s003) [file journal.pbio.1002585.s003]
